# Supplementary material for: Dehydrocostuslactone Suppresses Angiogenesis In Vitro and In Vivo through Inhibition of Akt/GSK-3β and mTOR Signaling Pathways
Source: PubMed Central journal article supplement (PMC3281050; doi:10.1371/journal.pone.0031195), 2012-02-16
Supplement: pone.0031195.s002.pdf [file pone.0031195.s002.pdf]

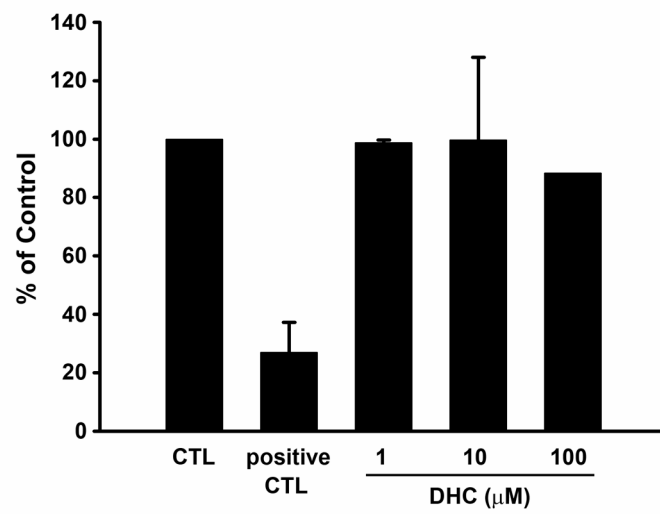

**Supplemental Figure S2. DHC did not inhibit Akt kinase activity.** Akt Kinase activity kit was purchased from Enzo Life Sciences. Data represent from three independent experiments.
