# Supplementary material for: Dehydrocostuslactone Suppresses Angiogenesis In Vitro and In Vivo through Inhibition of Akt/GSK-3β and mTOR Signaling Pathways
Source: PubMed Central journal article supplement (PMC3281050; doi:10.1371/journal.pone.0031195), 2012-02-16
Supplement: pone.0031195.s003.pdf [file pone.0031195.s003.pdf]

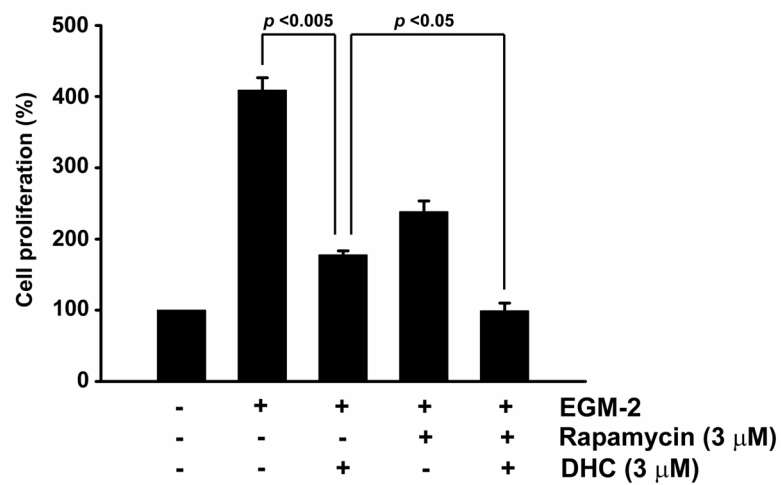

**Supplemental Figure S3. Rapamycin increased the anti-proliferative effect induced by DHC.** Crystal violet assay. HUVECs were treated with DHC (3  $\mu$ M) and/or rapamycin (3  $\mu$ M). Inhibition of mTOR activity increased the anti-proliferative effect of DHC. Data represent from three independent experiments.
